# Supplementary material for: A Novel Non-Intrusive Vibration Energy Harvesting Method for Air Conditioning Compressor Unit
Source: MDPI journal article supplement (doi:10.3390/su131810300), 2021-09-15
Supplement: s1 [file s1]

## Supplementary Materials

**Figure S1**

Result of vibration frequency using accelerometer.

|                |                | Location A |       |       |       |       |       |       |       |       |
|----------------|----------------|------------|-------|-------|-------|-------|-------|-------|-------|-------|
|                | Air flow rates | 1          |       |       | 2     |       |       | 3     |       |       |
|                | Temperature    | 20°C       | 22°C  | 24°C  | 20°C  | 22°C  | 24°C  | 20°C  | 22°C  | 24°C  |
| Frequency (Hz) | 1              | 201        | 234   | 211   | 272   | 254   | 244   | 268   | 270   | 251   |
|                | 2              | 245        | 210   | 169   | 253   | 271   | 227   | 301   | 290   | 233   |
|                | 3              | 266        | 247   | 183   | 248   | 234   | 213   | 286   | 265   | 237   |
|                | 4              | 235        | 215   | 179   | 226   | 241   | 235   | 278   | 280   | 254   |
|                | 5              | 222        | 231   | 210   | 247   | 251   | 208   | 244   | 263   | 242   |
|                | 6              | 267        | 209   | 201   | 286   | 246   | 246   | 253   | 247   | 251   |
|                | 7              | 214        | 234   | 198   | 277   | 237   | 237   | 263   | 251   | 238   |
|                | 8              | 266        | 241   | 179   | 239   | 253   | 254   | 268   | 259   | 245   |
|                | 9              | 225        | 235   | 192   | 222   | 246   | 216   | 278   | 249   | 231   |
|                | 10             | 212        | 245   | 195   | 245   | 229   | 223   | 289   | 257   | 245   |
|                | Average        | 235.3      | 230.1 | 191.7 | 251.5 | 246.2 | 230.3 | 272.8 | 263.1 | 242.7 |

| Location B     |                |       |       |       |       |       |       |      |       |       |
|----------------|----------------|-------|-------|-------|-------|-------|-------|------|-------|-------|
|                | Air flow rates | 1     |       |       | 2     |       |       | 3    |       |       |
|                | Temperature    | 20°C  | 22°C  | 24°C  | 20°C  | 22°C  | 24°C  | 20°C | 22°C  | 24°C  |
| Frequency (Hz) | 1              | 129   | 113   | 104   | 167   | 181   | 124   | 189  | 173   | 131   |
|                | 2              | 123   | 95    | 122   | 188   | 174   | 136   | 196  | 138   | 140   |
|                | 3              | 111   | 105   | 113   | 170   | 169   | 158   | 135  | 136   | 163   |
|                | 4              | 136   | 94    | 91    | 163   | 147   | 124   | 180  | 153   | 153   |
|                | 5              | 119   | 116   | 87    | 128   | 126   | 163   | 149  | 194   | 176   |
|                | 6              | 100   | 126   | 104   | 138   | 140   | 112   | 200  | 145   | 117   |
|                | 7              | 122   | 133   | 85    | 142   | 112   | 117   | 118  | 173   | 128   |
|                | 8              | 139   | 92    | 107   | 150   | 147   | 136   | 183  | 129   | 163   |
|                | 9              | 138   | 124   | 123   | 133   | 114   | 164   | 181  | 151   | 176   |
|                | 10             | 118   | 99    | 92    | 180   | 129   | 135   | 159  | 144   | 134   |
|                | Average        | 123.5 | 109.7 | 102.8 | 155.9 | 143.9 | 136.9 | 169  | 153.6 | 148.1 |

| Location C     |                |       |       |       |       |       |       |       |       |       |
|----------------|----------------|-------|-------|-------|-------|-------|-------|-------|-------|-------|
|                | Air flow rates | 1     |       |       | 2     |       |       | 3     |       |       |
|                | Temperature    | 20°C  | 22°C  | 24°C  | 20°C  | 22°C  | 24°C  | 20°C  | 22°C  | 24°C  |
| Frequency (Hz) | 1              | 134   | 182   | 124   | 242   | 238   | 253   | 379   | 243   | 274   |
|                | 2              | 224   | 156   | 160   | 249   | 264   | 214   | 221   | 231   | 311   |
|                | 3              | 153   | 231   | 174   | 267   | 323   | 222   | 297   | 225   | 228   |
|                | 4              | 219   | 152   | 132   | 351   | 238   | 274   | 386   | 353   | 214   |
|                | 5              | 239   | 221   | 231   | 264   | 197   | 312   | 228   | 217   | 276   |
|                | 6              | 201   | 187   | 112   | 256   | 243   | 253   | 284   | 247   | 235   |
|                | 7              | 190   | 211   | 196   | 343   | 219   | 206   | 354   | 283   | 243   |
|                | 8              | 250   | 162   | 144   | 284   | 274   | 219   | 337   | 241   | 266   |
|                | 9              | 242   | 174   | 216   | 249   | 320   | 224   | 263   | 363   | 289   |
|                | 10             | 187   | 145   | 163   | 343   | 275   | 211   | 349   | 348   | 315   |
|                | Average        | 203.9 | 182.1 | 165.2 | 284.8 | 259.1 | 238.8 | 309.8 | 275.1 | 265.1 |

| Location D     |                |       |       |       |       |       |       |       |       |       |
|----------------|----------------|-------|-------|-------|-------|-------|-------|-------|-------|-------|
|                | Air flow rates | 1     |       |       | 2     |       |       | 3     |       |       |
|                | Temperature    | 20°C  | 22°C  | 24°C  | 20°C  | 22°C  | 24°C  | 20°C  | 22°C  | 24°C  |
| Frequency (Hz) | 1              | 673   | 672   | 645   | 760   | 723   | 686   | 764   | 750   | 686   |
|                | 2              | 692   | 637   | 668   | 676   | 742   | 659   | 866   | 695   | 659   |
|                | 3              | 702   | 690   | 701   | 730   | 711   | 734   | 738   | 731   | 734   |
|                | 4              | 684   | 657   | 630   | 747   | 763   | 641   | 770   | 734   | 741   |
|                | 5              | 728   | 728   | 647   | 683   | 656   | 711   | 728   | 716   | 711   |
|                | 6              | 691   | 684   | 664   | 725   | 682   | 630   | 692   | 747   | 690   |
|                | 7              | 675   | 664   | 685   | 681   | 745   | 618   | 780   | 764   | 748   |
|                | 8              | 656   | 731   | 672   | 755   | 716   | 685   | 635   | 661   | 685   |
|                | 9              | 731   | 653   | 659   | 747   | 672   | 748   | 708   | 735   | 748   |
|                | 10             | 741   | 612   | 637   | 697   | 725   | 619   | 794   | 701   | 619   |
|                | Average        | 697.3 | 672.8 | 660.8 | 720.1 | 713.5 | 673.1 | 747.5 | 723.4 | 702.1 |

|                |                | Location E |       |       |       |       |       |       |       |       |
|----------------|----------------|------------|-------|-------|-------|-------|-------|-------|-------|-------|
|                | Air flow rates | 1          |       |       | 2     |       |       | 3     |       |       |
|                | Temperature    | 20°C       | 22°C  | 24°C  | 20°C  | 22°C  | 24°C  | 20°C  | 22°C  | 24°C  |
| Frequency (Hz) | 1              | 264        | 286   | 158   | 333   | 328   | 244   | 350   | 298   | 341   |
|                | 2              | 242        | 253   | 162   | 312   | 314   | 284   | 370   | 365   | 337   |
|                | 3              | 296        | 236   | 212   | 287   | 355   | 296   | 387   | 341   | 286   |
|                | 4              | 243        | 247   | 192   | 321   | 251   | 263   | 390   | 394   | 295   |
|                | 5              | 238        | 203   | 145   | 293   | 256   | 238   | 377   | 348   | 320   |
|                | 6              | 271        | 243   | 168   | 354   | 325   | 271   | 387   | 370   | 267   |
|                | 7              | 302        | 194   | 194   | 369   | 295   | 254   | 352   | 325   | 363   |
|                | 8              | 257        | 285   | 213   | 328   | 259   | 287   | 337   | 354   | 372   |
|                | 9              | 247        | 201   | 153   | 375   | 278   | 299   | 349   | 317   | 329   |
|                | 10             | 299        | 186   | 185   | 342   | 243   | 249   | 339   | 374   | 295   |
|                | Average        | 265.9      | 233.4 | 178.2 | 331.4 | 290.4 | 268.5 | 363.8 | 348.6 | 320.5 |

| Location F     |                |       |      |       |       |       |       |       |       |       |
|----------------|----------------|-------|------|-------|-------|-------|-------|-------|-------|-------|
|                | Air flow rates | 1     |      |       | 2     |       |       | 3     |       |       |
|                | Temperature    | 20°C  | 22°C | 24°C  | 20°C  | 22°C  | 24°C  | 20°C  | 22°C  | 24°C  |
| Frequency (Hz) | 1              | 780   | 701  | 642   | 778   | 753   | 732   | 810   | 838   | 760   |
|                | 2              | 711   | 724  | 697   | 829   | 796   | 693   | 838   | 826   | 784   |
|                | 3              | 681   | 650  | 659   | 738   | 721   | 675   | 827   | 762   | 809   |
|                | 4              | 708   | 649  | 630   | 826   | 735   | 754   | 844   | 748   | 817   |
|                | 5              | 676   | 685  | 647   | 814   | 759   | 705   | 786   | 864   | 765   |
|                | 6              | 667   | 651  | 705   | 790   | 711   | 741   | 880   | 736   | 723   |
|                | 7              | 721   | 741  | 685   | 767   | 737   | 685   | 834   | 832   | 759   |
|                | 8              | 754   | 742  | 610   | 781   | 753   | 702   | 837   | 758   | 740   |
|                | 9              | 684   | 649  | 634   | 824   | 795   | 731   | 875   | 743   | 742   |
|                | 10             | 721   | 738  | 712   | 784   | 726   | 715   | 771   | 884   | 795   |
|                | Average        | 710.3 | 693  | 662.1 | 793.1 | 748.6 | 713.3 | 830.2 | 799.1 | 769.4 |

**Figure S2**

One way ANOVA analysis for vibration frequency.

|                     |         |    |          |         |          |          |
|---------------------|---------|----|----------|---------|----------|----------|
| Point A (20°C)      |         |    |          |         |          |          |
| Source of Variation | SS      | df | MS       | F       | P-value  | F crit   |
| Between Groups      | 7074.6  | 2  | 3537.3   | 7.89041 | 0.002002 | 3.354131 |
| Within Groups       | 12104.2 | 27 | 448.3037 |         |          |          |
| Total               | 19178.8 | 29 |          |         |          |          |

|                     |          |    |          |          |                       |          |
|---------------------|----------|----|----------|----------|-----------------------|----------|
| Point A (22°C)      |          |    |          |          |                       |          |
| Source of Variation | SS       | df | MS       | F        | P-value               | F crit   |
| Between Groups      | 5446.067 | 2  | 2723.033 | 15.38308 | 3.47x10 <sup>-5</sup> | 3.354131 |
| Within Groups       | 4779.4   | 27 | 177.0148 |          |                       |          |
| Total               | 10225.47 | 29 |          |          |                       |          |

|                            |           |           |           |          |                      |               |
|----------------------------|-----------|-----------|-----------|----------|----------------------|---------------|
| Point A (24°C)             |           |           |           |          |                      |               |
| <i>Source of Variation</i> | <i>SS</i> | <i>df</i> | <i>MS</i> | <i>F</i> | <i>P-value</i>       | <i>F crit</i> |
| Between Groups             | 14149.07  | 2         | 7074.533  | 42.94054 | 4.15e-09             | 3.354131      |
| Within Groups              | 4448.3    | 27        | 164.7519  |          | 4.1x10 <sup>-9</sup> |               |
|                            |           |           |           |          |                      |               |
| Total                      | 18597.37  | 29        |           |          |                      |               |

|                            |           |           |           |          |                |               |
|----------------------------|-----------|-----------|-----------|----------|----------------|---------------|
| Point B (20°C)             |           |           |           |          |                |               |
| <i>Source of Variation</i> | <i>SS</i> | <i>df</i> | <i>MS</i> | <i>F</i> | <i>P-value</i> | <i>F crit</i> |
| Between Groups             | 10972.07  | 2         | 5486.033  | 12.30114 | 0.000159       | 3.354131      |
| Within Groups              | 12041.4   | 27        | 445.9778  |          |                |               |
|                            |           |           |           |          |                |               |
| Total                      | 23013.47  | 29        |           |          |                |               |

|                            |           |           |           |          |                |               |
|----------------------------|-----------|-----------|-----------|----------|----------------|---------------|
| Point B (22°C)             |           |           |           |          |                |               |
| <i>Source of Variation</i> | <i>SS</i> | <i>df</i> | <i>MS</i> | <i>F</i> | <i>P-value</i> | <i>F crit</i> |
| Between Groups             | 10636.47  | 2         | 5318.233  | 12.94394 | 0.000114       | 3.354131      |
| Within Groups              | 11093.4   | 27        | 410.8667  |          |                |               |
|                            |           |           |           |          |                |               |
| Total                      | 21729.87  | 29        |           |          |                |               |

|                            |           |           |           |          |                       |               |
|----------------------------|-----------|-----------|-----------|----------|-----------------------|---------------|
| Point B (24°C)             |           |           |           |          |                       |               |
| <i>Source of Variation</i> | <i>SS</i> | <i>df</i> | <i>MS</i> | <i>F</i> | <i>P-value</i>        | <i>F crit</i> |
| Between Groups             | 11134.47  | 2         | 5567.233  | 16.9057  | 1.74x10 <sup>-5</sup> | 3.354131      |
| Within Groups              | 8891.4    | 27        | 329.3111  |          |                       |               |
|                            |           |           |           |          |                       |               |
| Total                      | 20025.87  | 29        |           |          |                       |               |

|                            |           |           |           |          |                |               |
|----------------------------|-----------|-----------|-----------|----------|----------------|---------------|
| Point C (20°C)             |           |           |           |          |                |               |
| <i>Source of Variation</i> | <i>SS</i> | <i>df</i> | <i>MS</i> | <i>F</i> | <i>P-value</i> | <i>F crit</i> |
| Between Groups             | 61282.07  | 2         | 30641.03  | 13.14061 | 0.000103       | 3.354131      |
| Within Groups              | 62958.1   | 27        | 2331.781  |          |                |               |
|                            |           |           |           |          |                |               |
| Total                      | 124240.2  | 29        |           |          |                |               |

|                            |           |           |           |          |                |               |
|----------------------------|-----------|-----------|-----------|----------|----------------|---------------|
| Point C (22°C)             |           |           |           |          |                |               |
| <i>Source of Variation</i> | <i>SS</i> | <i>df</i> | <i>MS</i> | <i>F</i> | <i>P-value</i> | <i>F crit</i> |
| Between Groups             | 49446.67  | 2         | 24723.33  | 12.57434 | 0.000138       | 3.354131      |
| Within Groups              | 53086.7   | 27        | 1966.174  |          |                |               |
|                            |           |           |           |          |                |               |
| Total                      | 102533.4  | 29        |           |          |                |               |

|                            |           |           |           |          |                      |               |
|----------------------------|-----------|-----------|-----------|----------|----------------------|---------------|
| Point C (24°C)             |           |           |           |          |                      |               |
| <i>Source of Variation</i> | <i>SS</i> | <i>df</i> | <i>MS</i> | <i>F</i> | <i>P-value</i>       | <i>F crit</i> |
| Between Groups             | 53628.87  | 2         | 26814.43  | 20.59474 | 3.7x10 <sup>-6</sup> | 3.354131      |
| Within Groups              | 35154.1   | 27        | 1302.004  |          |                      |               |
|                            |           |           |           |          |                      |               |
| Total                      | 88782.97  | 29        |           |          |                      |               |

|                            |           |           |           |          |                |               |
|----------------------------|-----------|-----------|-----------|----------|----------------|---------------|
| Point D (20°C)             |           |           |           |          |                |               |
| <i>Source of Variation</i> | <i>SS</i> | <i>df</i> | <i>MS</i> | <i>F</i> | <i>P-value</i> | <i>F crit</i> |
| Between Groups             | 12635.47  | 2         | 6317.733  | 3.241864 | 0.054721       | 3.354131      |
| Within Groups              | 52617.5   | 27        | 1948.796  |          |                |               |
|                            |           |           |           |          |                |               |
| Total                      | 65252.97  | 29        |           |          |                |               |

|                            |           |           |           |          |                |               |
|----------------------------|-----------|-----------|-----------|----------|----------------|---------------|
| Point D (22°C)             |           |           |           |          |                |               |
| <i>Source of Variation</i> | <i>SS</i> | <i>df</i> | <i>MS</i> | <i>F</i> | <i>P-value</i> | <i>F crit</i> |
| Between Groups             | 14382.87  | 2         | 7191.433  | 6.156561 | 0.006268       | 3.354131      |
| Within Groups              | 31538.5   | 27        | 1168.093  |          |                |               |
|                            |           |           |           |          |                |               |
| Total                      | 45921.37  | 29        |           |          |                |               |

|                            |           |           |           |          |                |               |
|----------------------------|-----------|-----------|-----------|----------|----------------|---------------|
| Point D (24°C)             |           |           |           |          |                |               |
| <i>Source of Variation</i> | <i>SS</i> | <i>df</i> | <i>MS</i> | <i>F</i> | <i>P-value</i> | <i>F crit</i> |
| Between Groups             | 8993.267  | 2         | 4496.633  | 2.979701 | 0.067716       | 3.354131      |
| Within Groups              | 40745.4   | 27        | 1509.089  |          |                |               |
|                            |           |           |           |          |                |               |
| Total                      | 49738.67  | 29        |           |          |                |               |

|                            |           |           |           |          |                      |               |
|----------------------------|-----------|-----------|-----------|----------|----------------------|---------------|
| Point E (20°C)             |           |           |           |          |                      |               |
| <i>Source of Variation</i> | <i>SS</i> | <i>df</i> | <i>MS</i> | <i>F</i> | <i>P-value</i>       | <i>F crit</i> |
| Between Groups             | 49748.07  | 2         | 24874.03  | 38.63116 | 1.2x10 <sup>-8</sup> | 3.354131      |
| Within Groups              | 17384.9   | 27        | 643.8852  |          |                      |               |
|                            |           |           |           |          |                      |               |
| Total                      | 67132.97  | 29        |           |          |                      |               |

|                            |           |           |           |          |                        |               |
|----------------------------|-----------|-----------|-----------|----------|------------------------|---------------|
| Point E (22°C)             |           |           |           |          |                        |               |
| <i>Source of Variation</i> | <i>SS</i> | <i>df</i> | <i>MS</i> | <i>F</i> | <i>P-value</i>         | <i>F crit</i> |
| Between Groups             | 66357.6   | 2         | 33178.8   | 27.15353 | 3.44x10 <sup>-77</sup> | 3.354131      |
| Within Groups              | 32991.2   | 27        | 1221.896  |          |                        |               |
|                            |           |           |           |          |                        |               |
| Total                      | 99348.8   | 29        |           |          |                        |               |

|                            |           |           |           |          |                        |               |
|----------------------------|-----------|-----------|-----------|----------|------------------------|---------------|
| Point E (24°C)             |           |           |           |          |                        |               |
| <i>Source of Variation</i> | <i>SS</i> | <i>df</i> | <i>MS</i> | <i>F</i> | <i>P-value</i>         | <i>F crit</i> |
| Between Groups             | 103691.3  | 2         | 51845.63  | 68.77227 | 2.53x10 <sup>-11</sup> | 3.354131      |
| Within Groups              | 20354.6   | 27        | 753.8741  |          |                        |               |
|                            |           |           |           |          |                        |               |
| Total                      | 124045.9  | 29        |           |          |                        |               |

|                            |           |           |           |          |                       |               |
|----------------------------|-----------|-----------|-----------|----------|-----------------------|---------------|
| Point F (20°C)             |           |           |           |          |                       |               |
| <i>Source of Variation</i> | <i>SS</i> | <i>df</i> | <i>MS</i> | <i>F</i> | <i>P-value</i>        | <i>F crit</i> |
| Between Groups             | 75360.87  | 2         | 37680.43  | 33.65816 | 4.64x10 <sup>-8</sup> | 3.354131      |
| Within Groups              | 30226.6   | 27        | 1119.504  |          |                       |               |
|                            |           |           |           |          |                       |               |
| Total                      | 105587.5  | 29        |           |          |                       |               |

|                            |           |           |           |          |                       |               |
|----------------------------|-----------|-----------|-----------|----------|-----------------------|---------------|
| Point F (22°C)             |           |           |           |          |                       |               |
| <i>Source of Variation</i> | <i>SS</i> | <i>df</i> | <i>MS</i> | <i>F</i> | <i>P-value</i>        | <i>F crit</i> |
| Between Groups             | 56329.4   | 2         | 28164.7   | 15.08784 | 3.99x10 <sup>-5</sup> | 3.354131      |
| Within Groups              | 50401.3   | 27        | 1866.715  |          |                       |               |
|                            |           |           |           |          |                       |               |
| Total                      | 106730.7  | 29        |           |          |                       |               |

|                            |           |           |           |          |                       |               |
|----------------------------|-----------|-----------|-----------|----------|-----------------------|---------------|
| Point F (24°C)             |           |           |           |          |                       |               |
| <i>Source of Variation</i> | <i>SS</i> | <i>df</i> | <i>MS</i> | <i>F</i> | <i>P-value</i>        | <i>F crit</i> |
| Between Groups             | 57606.47  | 2         | 28803.23  | 30.02491 | 1.37x10 <sup>-7</sup> | 3.354131      |
| Within Groups              | 25901.4   | 27        | 959.3111  |          |                       |               |
|                            |           |           |           |          |                       |               |
| Total                      | 83507.87  | 29        |           |          |                       |               |

**Figure S3**

Two way ANOVA analysis for vibration frequency

| Location A                 |           |           |           |          |               |                             |
|----------------------------|-----------|-----------|-----------|----------|---------------|-----------------------------|
| <i>Source of Variation</i> | <i>SS</i> | <i>df</i> | <i>MS</i> | <i>F</i> | <i>F crit</i> | <i>Significant (yes/no)</i> |
| Factor A (Temperature)     | 16660.16  | 2         | 8330.078  | 31.63039 | 3.109311      | yes                         |
| Factor B (Air flow rates)  | 24832.69  | 2         | 12416.34  | 47.14648 | 3.109311      | yes                         |
| Factor AB                  | 1837.044  | 4         | 459.2611  | 1.743874 | 2.484441      | no                          |
| Error                      | 21331.9   | 81        | 263.3568  |          |               |                             |
|                            |           |           |           |          |               |                             |
| Total                      | 64661.79  | 89        |           |          |               |                             |

| Location B                 |           |           |           |          |               |                             |
|----------------------------|-----------|-----------|-----------|----------|---------------|-----------------------------|
| <i>Source of Variation</i> | <i>SS</i> | <i>df</i> | <i>MS</i> | <i>F</i> | <i>F crit</i> | <i>Significant (yes/no)</i> |
| Factor A (Temperature)     | 6384.622  | 2         | 3192.311  | 8.073927 | 3.109311      | yes                         |
| Factor B (Air flow rates)  | 32711.76  | 2         | 16355.88  | 41.36695 | 3.109311      | yes                         |
| Factor AB                  | 31.24444  | 4         | 7.811111  | 0.019756 | 2.484441      | no                          |
| Within                     | 32026.2   | 81        | 395.3852  |          |               |                             |
|                            |           |           |           |          |               |                             |
| Total                      | 71153.82  | 89        |           |          |               |                             |

| Location C                 |           |           |           |          |               |                             |
|----------------------------|-----------|-----------|-----------|----------|---------------|-----------------------------|
| <i>Source of Variation</i> | <i>SS</i> | <i>df</i> | <i>MS</i> | <i>F</i> | <i>F crit</i> | <i>Significant (yes/no)</i> |
| Factor A (Temperature)     | 28587.82  | 2         | 14293.91  | 7.657508 | 3.109311      | yes                         |
| Factor B (Air flow rates)  | 163781.1  | 2         | 81890.54  | 43.87025 | 3.109311      | yes                         |
| Factor AB                  | 576.5111  | 4         | 144.1278  | 0.077212 | 2.484441      | no                          |
| Error                      | 151198.9  | 81        | 1866.653  |          |               |                             |
|                            |           |           |           |          |               |                             |
| Total                      | 344144.3  | 89        |           |          |               |                             |

| Location D                 |           |           |           |          |               |                             |
|----------------------------|-----------|-----------|-----------|----------|---------------|-----------------------------|
| <i>Source of Variation</i> | <i>SS</i> | <i>df</i> | <i>MS</i> | <i>F</i> | <i>F crit</i> | <i>Significant (yes/no)</i> |
| Factor A (Temperature)     | 27882.16  | 2         | 13941.08  | 9.04095  | 3.109311      | yes                         |
| Factor B (Air flow rates)  | 33704.16  | 2         | 16852.08  | 10.92877 | 3.109311      | yes                         |
| Factor AB                  | 2307.444  | 4         | 576.8611  | 0.374101 | 2.484441      | no                          |
| Error                      | 124901.4  | 81        | 1541.993  |          |               |                             |
|                            |           |           |           |          |               |                             |
| Total                      | 188795.2  | 89        |           |          |               |                             |

| Location E                 |           |           |           |          |               |                             |
|----------------------------|-----------|-----------|-----------|----------|---------------|-----------------------------|
| <i>Source of Variation</i> | <i>SS</i> | <i>df</i> | <i>MS</i> | <i>F</i> | <i>F crit</i> | <i>Significant (yes/no)</i> |
| Factor A (Temperature)     | 62813.27  | 2         | 31406.63  | 35.96652 | 3.109311      | yes                         |
| Factor B (Air flow rates)  | 213253.1  | 2         | 106626.5  | 122.1075 | 3.109311      | yes                         |
| Factor AB                  | 6543.867  | 4         | 1635.967  | 1.873491 | 2.484441      | no                          |
| Error                      | 70730.7   | 81        | 873.2185  |          |               |                             |
|                            |           |           |           |          |               |                             |
| Total                      | 353340.9  | 89        |           |          |               |                             |

| Location F                 |           |           |           |          |               |                             |
|----------------------------|-----------|-----------|-----------|----------|---------------|-----------------------------|
| <i>Source of Variation</i> | <i>SS</i> | <i>df</i> | <i>MS</i> | <i>F</i> | <i>F crit</i> | <i>Significant (yes/no)</i> |
| Factor A (Temperature)     | 59414.07  | 2         | 29707.03  | 22.58787 | 3.109311      | yes                         |
| Factor B (Air flow rates)  | 186318.6  | 2         | 93159.3   | 70.83406 | 3.109311      | yes                         |
| Factor AB                  | 2978.133  | 4         | 744.5333  | 0.566109 | 2.484441      | no                          |
| Error                      | 106529.3  | 81        | 1315.177  |          |               |                             |
|                            |           |           |           |          |               |                             |
| Total                      | 355240.1  | 89        |           |          |               |                             |

**Figure S4**

Result of RMS voltage utilizing piezoelectric sensor

| Location A          |                |        |       |       |        |        |        |        |        |        |
|---------------------|----------------|--------|-------|-------|--------|--------|--------|--------|--------|--------|
|                     | Air flow rates | 1      |       |       | 2      |        |        | 3      |        |        |
|                     | Temperature    | 20°C   | 22°C  | 24°C  | 20°C   | 22°C   | 24°C   | 20°C   | 22°C   | 24°C   |
| RMS voltage (mV)    | 1              | 103.23 | 53.28 | 59.94 | 74.37  | 58.83  | 71.04  | 106.56 | 138.75 | 106.56 |
|                     | 2              | 71.04  | 57.72 | 48.84 | 81.03  | 75.48  | 81.03  | 115.44 | 116.55 | 85.47  |
|                     | 3              | 79.92  | 67.71 | 67.71 | 93.24  | 71.04  | 89.91  | 98.79  | 74.37  | 64.38  |
|                     | 4              | 84.36  | 43.29 | 41.07 | 83.25  | 79.92  | 58.83  | 77.7   | 132.09 | 108.78 |
|                     | 5              | 56.61  | 69.93 | 68.82 | 101.01 | 104.34 | 114.33 | 140.97 | 93.24  | 59.94  |
|                     | 6              | 47.73  | 63.27 | 83.25 | 116.55 | 96.57  | 103.23 | 95.46  | 79.92  | 119.88 |
|                     | 7              | 75.48  | 82.14 | 43.29 | 115.44 | 92.13  | 93.24  | 102.12 | 72.15  | 72.15  |
|                     | 8              | 58.83  | 52.17 | 72.15 | 69.93  | 87.69  | 83.25  | 112.11 | 81.03  | 71.04  |
|                     | 9              | 48.84  | 81.03 | 58.83 | 108.78 | 99.9   | 74.37  | 89.91  | 99.9   | 105.45 |
|                     | 10             | 71.04  | 69.93 | 44.4  | 109.89 | 115.44 | 65.49  | 96.57  | 94.35  | 124.32 |
| Average RMS voltage |                | 69.71  | 64.05 | 58.83 | 95.35  | 88.13  | 83.47  | 103.56 | 98.24  | 91.80  |

| Location B          |                |       |       |       |       |       |       |       |       |       |
|---------------------|----------------|-------|-------|-------|-------|-------|-------|-------|-------|-------|
|                     | Air flow rates | 1     |       |       | 2     |       |       | 3     |       |       |
|                     | Temperature    | 20°C  | 22°C  | 24°C  | 20°C  | 22°C  | 24°C  | 20°C  | 22°C  | 24°C  |
| RMS voltage (mV)    | 1              | 21.09 | 25.53 | 13.32 | 26.64 | 46.62 | 25.53 | 48.84 | 38.85 | 41.07 |
|                     | 2              | 24.42 | 38.85 | 16.65 | 35.52 | 33.3  | 21.09 | 65.49 | 54.39 | 47.73 |
|                     | 3              | 41.07 | 24.42 | 23.31 | 41.07 | 18.87 | 27.75 | 44.4  | 59.94 | 56.61 |
|                     | 4              | 14.43 | 19.98 | 37.74 | 21.09 | 24.42 | 43.29 | 41.07 | 32.19 | 71.04 |
|                     | 5              | 18.87 | 16.65 | 28.86 | 28.86 | 35.52 | 18.87 | 68.82 | 62.16 | 37.74 |
|                     | 6              | 19.98 | 9.99  | 12.21 | 43.29 | 41.07 | 28.86 | 74.37 | 46.62 | 36.63 |
|                     | 7              | 27.75 | 29.97 | 18.87 | 49.95 | 37.74 | 36.63 | 65.49 | 41.07 | 27.75 |
|                     | 8              | 32.19 | 15.54 | 27.75 | 27.75 | 23.31 | 29.97 | 44.4  | 37.74 | 43.29 |
|                     | 9              | 26.64 | 34.41 | 31.08 | 31.08 | 25.53 | 38.85 | 58.83 | 54.39 | 28.86 |
|                     | 10             | 36.63 | 32.19 | 14.43 | 39.96 | 39.96 | 25.53 | 49.95 | 67.71 | 48.84 |
| Average RMS voltage |                | 26.31 | 24.75 | 22.42 | 34.52 | 32.63 | 29.64 | 56.17 | 49.51 | 43.96 |

| Location C          |                |        |        |       |        |        |        |        |        |        |
|---------------------|----------------|--------|--------|-------|--------|--------|--------|--------|--------|--------|
|                     | Air flow rates | 1      |        |       | 2      |        |        | 3      |        |        |
|                     | Temperature    | 20°C   | 22°C   | 24°C  | 20°C   | 22°C   | 24°C   | 20°C   | 22°C   | 24°C   |
| RMS voltage (mV)    | 1              | 116.55 | 93.24  | 95.46 | 134.31 | 104.34 | 113.22 | 118.77 | 130.98 | 83.25  |
|                     | 2              | 74.37  | 101.01 | 72.15 | 126.54 | 89.91  | 86.58  | 88.8   | 98.79  | 97.68  |
|                     | 3              | 103.23 | 84.36  | 81.03 | 104.34 | 125.43 | 71.04  | 139.86 | 113.22 | 113.22 |
|                     | 4              | 79.92  | 116.55 | 91.02 | 79.92  | 96.57  | 93.24  | 116.55 | 104.34 | 130.98 |
|                     | 5              | 132.09 | 79.92  | 93.24 | 120.99 | 83.25  | 103.23 | 144.3  | 137.64 | 113.22 |
|                     | 6              | 98.79  | 94.35  | 83.25 | 94.35  | 135.42 | 126.54 | 95.46  | 93.24  | 81.03  |
|                     | 7              | 92.13  | 82.14  | 97.68 | 124.32 | 73.26  | 71.04  | 147.63 | 132.09 | 71.04  |
|                     | 8              | 115.44 | 104.34 | 82.14 | 104.34 | 114.33 | 86.58  | 125.43 | 82.14  | 94.35  |
|                     | 9              | 96.57  | 89.91  | 73.26 | 125.43 | 98.79  | 94.35  | 82.14  | 114.33 | 108.78 |
|                     | 10             | 108.78 | 71.04  | 92.13 | 92.13  | 103.23 | 87.69  | 114.33 | 108.78 | 78.81  |
| Average RMS voltage |                | 101.79 | 91.69  | 86.14 | 110.67 | 102.45 | 93.35  | 117.33 | 111.56 | 97.24  |

| Location D          |                |        |        |        |        |        |        |        |        |        |
|---------------------|----------------|--------|--------|--------|--------|--------|--------|--------|--------|--------|
|                     | Air flow rates | 1      |        |        | 2      |        |        | 3      |        |        |
|                     | Temperature    | 20°C   | 22°C   | 24°C   | 20°C   | 22°C   | 24°C   | 20°C   | 22°C   | 24°C   |
| RMS voltage (mV)    | 1              | 412.92 | 356.31 | 304.14 | 578.31 | 406.26 | 406.26 | 428.46 | 503.94 | 427.35 |
|                     | 2              | 365.19 | 265.29 | 354.09 | 479.52 | 479.52 | 502.83 | 499.5  | 473.97 | 365.19 |
|                     | 3              | 509.49 | 426.24 | 325.23 | 513.93 | 427.35 | 416.25 | 466.2  | 416.25 | 468.42 |
|                     | 4              | 486.18 | 362.97 | 523.92 | 415.14 | 564.99 | 477.3  | 446.22 | 455.1  | 486.18 |
|                     | 5              | 361.86 | 478.41 | 392.94 | 516.15 | 516.15 | 301.92 | 463.98 | 438.45 | 361.86 |
|                     | 6              | 358.53 | 314.13 | 266.4  | 379.62 | 385.17 | 356.31 | 495.06 | 467.31 | 358.53 |
|                     | 7              | 385.17 | 346.32 | 404.04 | 463.98 | 456.21 | 460.65 | 562.77 | 429.57 | 496.17 |
|                     | 8              | 405.15 | 396.27 | 457.32 | 487.29 | 502.83 | 404.04 | 421.8  | 478.41 | 405.15 |
|                     | 9              | 385.17 | 428.46 | 384.06 | 435.12 | 445.11 | 405.15 | 532.8  | 430.68 | 385.17 |
|                     | 10             | 479.52 | 446.22 | 275.28 | 446.22 | 401.82 | 449.55 | 572.76 | 589.41 | 482.85 |
| Average RMS voltage |                | 414.92 | 382.06 | 368.74 | 471.53 | 458.54 | 418.03 | 488.96 | 468.31 | 423.69 |

| Location E          |                |        |        |        |        |        |        |        |        |        |
|---------------------|----------------|--------|--------|--------|--------|--------|--------|--------|--------|--------|
|                     | Air flow rates | 1      |        |        | 2      |        |        | 3      |        |        |
|                     | Temperature    | 20°C   | 22°C   | 24°C   | 20°C   | 22°C   | 24°C   | 20°C   | 22°C   | 24°C   |
| RMS voltage (mV)    | 1              | 139.86 | 104.34 | 86.58  | 115.44 | 137.64 | 77.7   | 139.86 | 132.09 | 106.56 |
|                     | 2              | 113.22 | 129.87 | 126.54 | 169.83 | 122.1  | 113.22 | 146.52 | 115.44 | 133.2  |
|                     | 3              | 105.45 | 138.75 | 117.66 | 124.32 | 96.57  | 125.43 | 157.62 | 154.29 | 127.65 |
|                     | 4              | 81.03  | 122.1  | 96.57  | 103.23 | 116.55 | 94.35  | 117.66 | 139.86 | 113.22 |
|                     | 5              | 95.46  | 82.14  | 62.16  | 96.57  | 82.14  | 124.32 | 129.87 | 113.22 | 115.44 |
|                     | 6              | 124.32 | 116.55 | 81.03  | 137.64 | 160.95 | 138.75 | 133.2  | 125.43 | 143.19 |
|                     | 7              | 118.77 | 103.23 | 75.48  | 154.29 | 113.22 | 98.79  | 164.28 | 113.22 | 130.98 |
|                     | 8              | 136.53 | 142.08 | 115.44 | 118.77 | 153.18 | 153.18 | 112.11 | 133.2  | 116.55 |
|                     | 9              | 104.34 | 84.36  | 107.67 | 157.62 | 138.75 | 104.34 | 142.08 | 157.62 | 101.01 |
|                     | 10             | 126.54 | 91.02  | 67.71  | 142.08 | 146.52 | 139.86 | 156.51 | 127.65 | 120.99 |
| Average RMS voltage |                | 114.55 | 111.44 | 93.68  | 131.98 | 126.76 | 116.99 | 139.97 | 131.20 | 120.88 |

| Location F          |                |        |        |        |        |        |        |        |        |        |
|---------------------|----------------|--------|--------|--------|--------|--------|--------|--------|--------|--------|
|                     | Air flow rates | 1      |        |        | 2      |        |        | 3      |        |        |
|                     | Temperature    | 20°C   | 22°C   | 24°C   | 20°C   | 22°C   | 24°C   | 20°C   | 22°C   | 24°C   |
| RMS voltage (mV)    | 1              | 557.22 | 412.92 | 325.23 | 388.5  | 364.08 | 426.24 | 520.59 | 508.38 | 485.07 |
|                     | 2              | 469.53 | 365.19 | 407.37 | 513.93 | 467.31 | 345.21 | 491.73 | 434.01 | 424.02 |
|                     | 3              | 365.19 | 509.49 | 281.94 | 476.19 | 315.24 | 473.97 | 531.69 | 557.22 | 526.14 |
|                     | 4              | 467.31 | 486.18 | 479.52 | 465.09 | 382.95 | 329.67 | 499.5  | 485.07 | 455.1  |
|                     | 5              | 455.1  | 361.86 | 294.15 | 426.24 | 447.33 | 378.51 | 490.62 | 500.61 | 416.25 |
|                     | 6              | 525.03 | 358.53 | 483.96 | 557.22 | 475.08 | 415.14 | 453.99 | 557.22 | 476.19 |
|                     | 7              | 463.98 | 385.17 | 415.14 | 536.13 | 539.46 | 482.85 | 561.66 | 481.74 | 486.18 |
|                     | 8              | 424.02 | 405.15 | 388.5  | 475.08 | 557.22 | 518.37 | 480.63 | 542.79 | 422.91 |
|                     | 9              | 379.62 | 385.17 | 469.53 | 503.94 | 487.29 | 435.12 | 530.58 | 414.03 | 401.82 |
|                     | 10             | 398.49 | 479.52 | 370.74 | 399.6  | 547.23 | 535.02 | 547.23 | 467.31 | 467.31 |
| Average RMS voltage |                | 450.55 | 414.92 | 391.61 | 474.19 | 458.32 | 434.01 | 510.82 | 494.84 | 456.10 |

**Figure S5**

Two factors ANOVA analysis for RMS voltage

| Location A                 |          |    |          |          |          |                      |
|----------------------------|----------|----|----------|----------|----------|----------------------|
| Source of Variation        | SS       | df | MS       | F        | F crit   | Significant (yes/no) |
| Factor A (Temperature)     | 1988.144 | 2  | 994.072  | 3.010586 | 3.109311 | no                   |
| Factor B (Air flow rates ) | 18270.67 | 2  | 9135.337 | 27.66673 | 3.109311 | yes                  |
| Factor AB                  | 14.26498 | 4  | 3.566245 | 0.010801 | 2.484441 | no                   |
| Error                      | 26745.56 | 81 | 330.1922 |          |          |                      |
| Total                      | 47018.65 | 89 |          |          |          |                      |

| Location B                 |          |    |          |          |          |                      |
|----------------------------|----------|----|----------|----------|----------|----------------------|
| Source of Variation        | SS       | df | MS       | F        | F crit   | Significant (yes/no) |
| Factor A (Temperature)     | 733.8661 | 2  | 366.9331 | 3.641492 | 3.109311 | yes                  |
| Factor B (Air flow rates ) | 10148.01 | 2  | 5074.007 | 50.35511 | 3.109311 | yes                  |
| Factor AB                  | 211.401  | 4  | 52.85025 | 0.524493 | 2.484441 | no                   |
| Error                      | 8161.923 | 81 | 100.7645 |          |          |                      |
| Total                      | 19255.2  | 89 |          |          |          |                      |

| Location C                 |          |    |          |          |          |                      |
|----------------------------|----------|----|----------|----------|----------|----------------------|
| Source of Variation        | SS       | df | MS       | F        | F crit   | Significant (yes/no) |
| Factor A (Temperature)     | 4705.171 | 2  | 2352.585 | 7.662239 | 3.109311 | yes                  |
| Factor B (Air flow rates ) | 3634.065 | 2  | 1817.033 | 5.917974 | 3.109311 | yes                  |
| Factor AB                  | 194.6444 | 4  | 48.66111 | 0.158486 | 2.484441 | no                   |
| Error                      | 24869.94 | 81 | 307.0363 |          |          |                      |
| Total                      | 33403.82 | 89 |          |          |          |                      |

| Location D                 |          |    |          |          |          |                      |
|----------------------------|----------|----|----------|----------|----------|----------------------|
| Source of Variation        | SS       | df | MS       | F        | F crit   | Significant (yes/no) |
| Factor A (Temperature)     | 45913.06 | 2  | 22956.53 | 6.352493 | 3.109311 | yes                  |
| Factor B (Air flow rates ) | 89625.5  | 2  | 44812.75 | 12.40051 | 3.109311 | yes                  |
| Factor AB                  | 3217.095 | 4  | 804.2738 | 0.222557 | 2.484441 | no                   |
| Error                      | 292716.4 | 81 | 3613.783 |          |          |                      |
| Total                      | 431472.1 | 89 |          |          |          |                      |

|                            |           |           |           |          |               |                             |
|----------------------------|-----------|-----------|-----------|----------|---------------|-----------------------------|
| Location E                 |           |           |           |          |               |                             |
| <i>Source of Variation</i> | <i>SS</i> | <i>df</i> | <i>MS</i> | <i>F</i> | <i>F crit</i> | <i>Significant (yes/no)</i> |
| Factor A (Temperature)     | 5270.951  | 2         | 2635.476  | 6.219239 | 3.109311      | yes                         |
| Factor B (Air flow rates)  | 9606.793  | 2         | 4803.397  | 11.33513 | 3.109311      | yes                         |
| Factor AB                  | 248.0354  | 4         | 62.00885  | 0.14633  | 2.484441      | no                          |
| Error                      | 34324.7   | 81        | 423.7618  |          |               |                             |
|                            |           |           |           |          |               |                             |
| Total                      | 49450.48  | 89        |           |          |               |                             |

|                            |           |           |           |          |               |                             |
|----------------------------|-----------|-----------|-----------|----------|---------------|-----------------------------|
| Location F                 |           |           |           |          |               |                             |
| <i>Source of Variation</i> | <i>SS</i> | <i>df</i> | <i>MS</i> | <i>F</i> | <i>F crit</i> | <i>Significant (yes/no)</i> |
| Factor A (Temperature)     | 39645.47  | 2         | 19822.74  | 5.546305 | 3.109311      | yes                         |
| Factor B (Air flow rates)  | 69938.05  | 2         | 34969.02  | 9.784162 | 3.109311      | yes                         |
| Factor AB                  | 2005.339  | 4         | 501.3346  | 0.140271 | 2.484441      | no                          |
| Error                      | 289497.5  | 81        | 3574.044  |          |               |                             |
|                            |           |           |           |          |               |                             |
| Total                      | 401086.4  | 89        |           |          |               |                             |
